# Supplementary material
Source: publisher figshare collection journal article supplement (https://gsajournals.figshare.com/articles/dataset/_/13207547)
Supplement: Supplementary file 1 [file 1]

### Density of heterozygous SNPs in heterozygous blocks

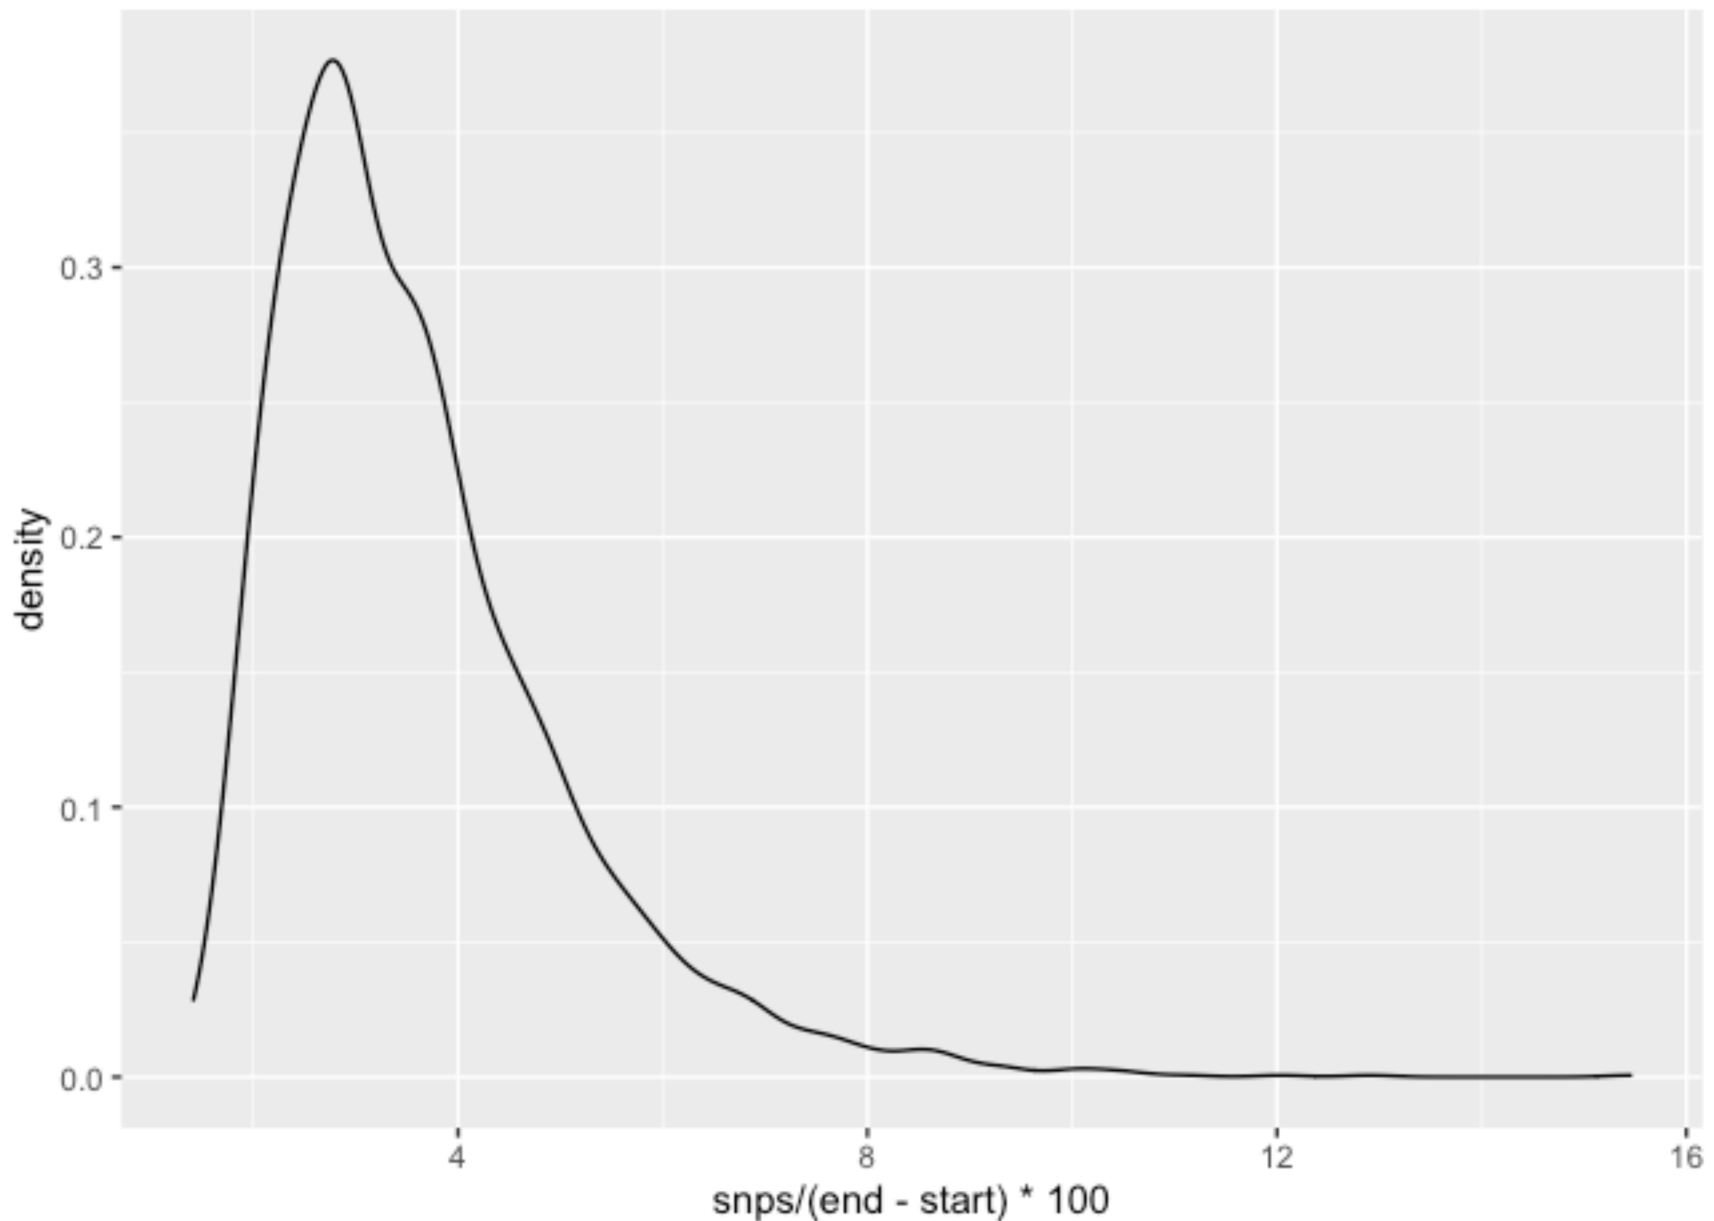

**Figure S3.** Density plot of the haplotype divergence in *C. stellatoidea*, where the x-axis represents the percentage of haplotype divergence (calculated by the number of heterozygous SNPs divided by the heterozygous block size), and the y-axis corresponds to the blocks density.
