# Supplementary material
Source: publisher figshare collection journal article supplement (https://gsajournals.figshare.com/articles/dataset/_/13207547)
Supplement: Supplementary file 2 [file 1]

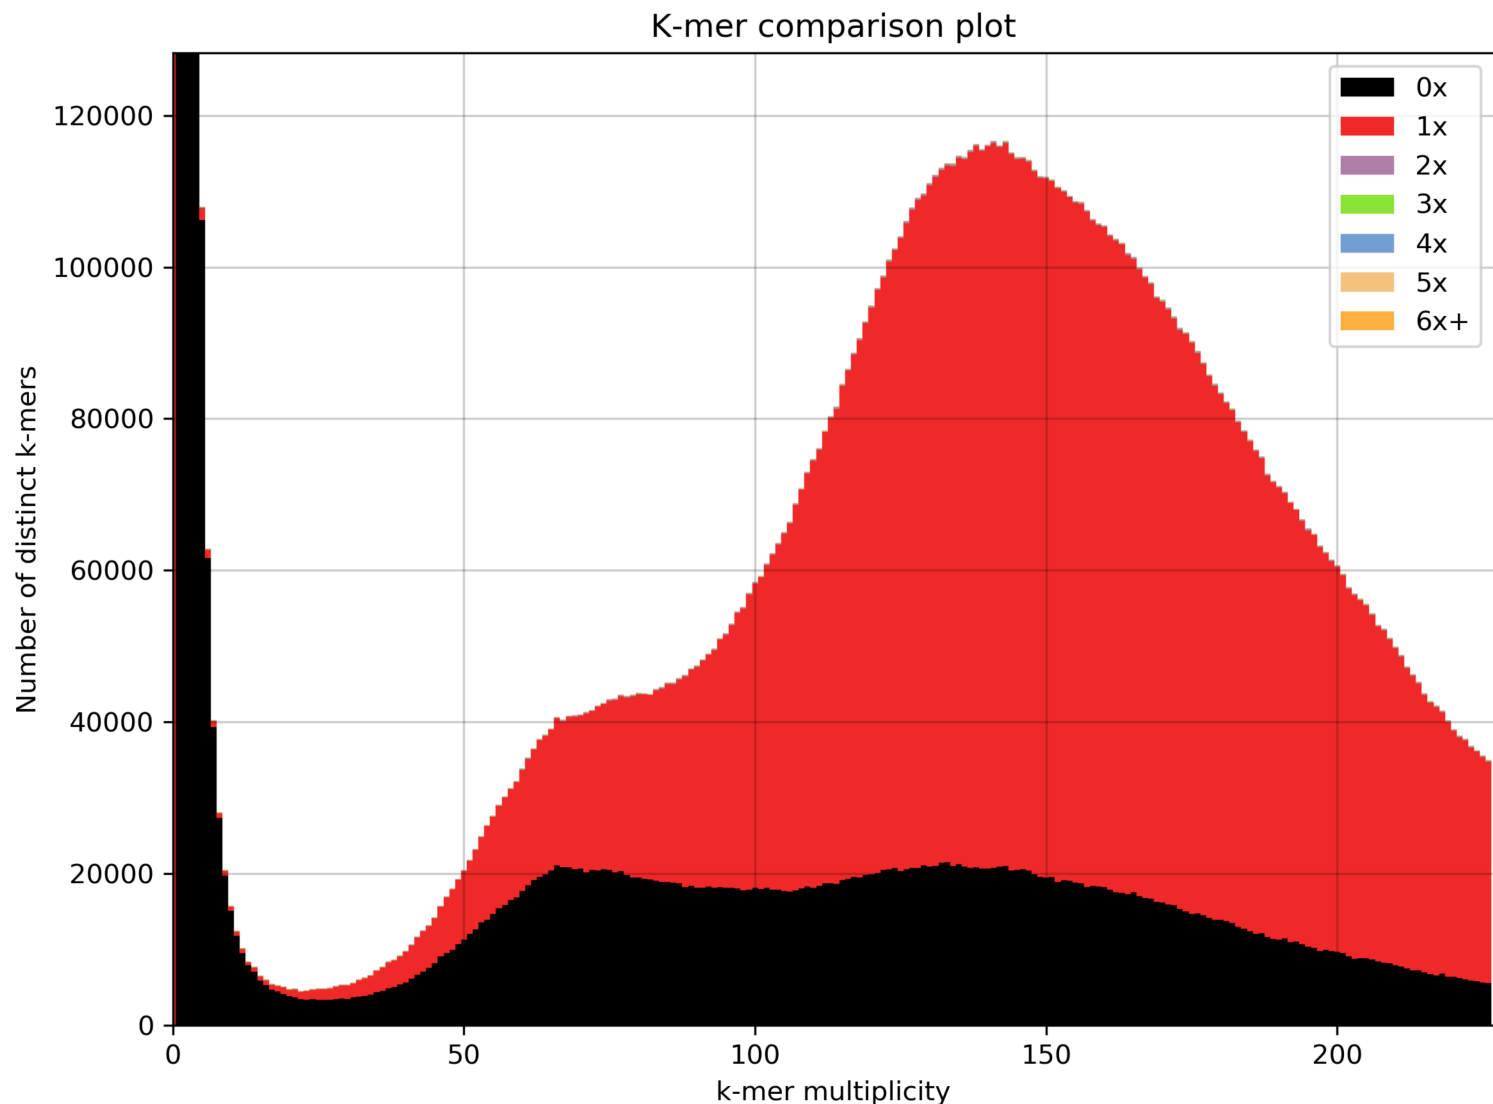

**Figure S1.** Frequency of 27-mers coverage (k-mer multiplicity) in *C. stellatoidea* genomic reads. The proportion of 27-mers which are absent (black) or at 1x coverage (red) in *C. albicans* SC5314 haplotype A is represented in the fill of the density line. The number of k-mers including heterozygous positions (levels of heterozygosity) determine the height of the peaks. The fraction of k-mers not included in the reference relates with the levels of heterozygosity, as they correspond to the alternative haplotype that is not represented in the reference genome.
